# Supplementary material
Source: PubMed Central journal article supplement (PMC6994332)

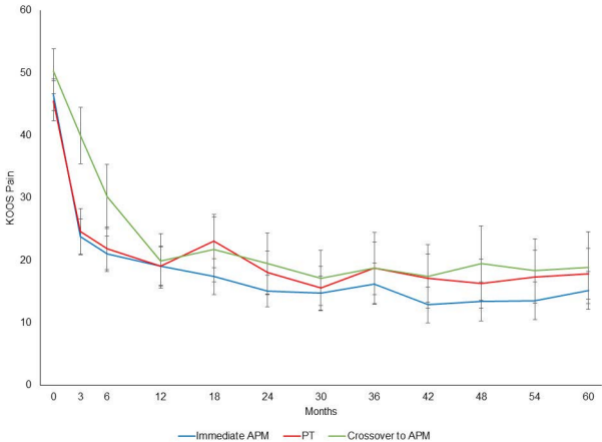

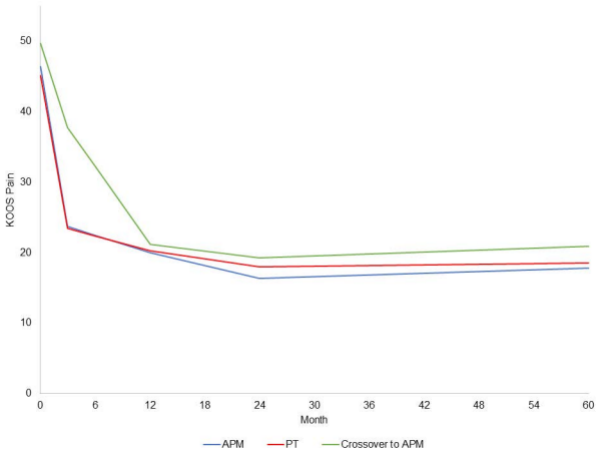

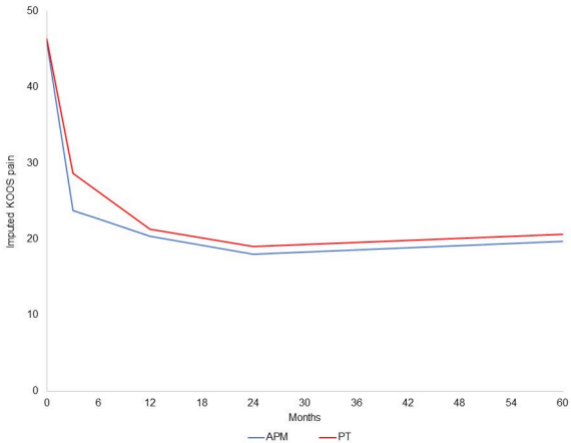

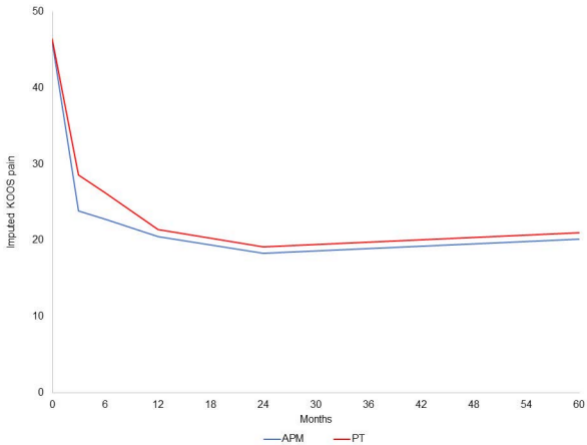

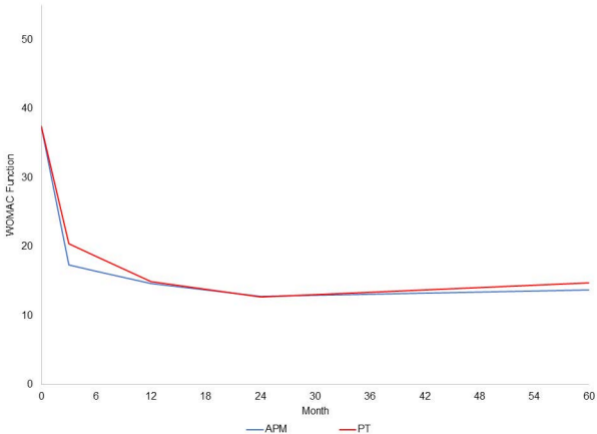

Supplement: NIHMS1046124-supplement-Supp_figS1-5.pdf [file NIHMS1046124-supplement-Supp_figS1-5.pdf]
